# Supplementary material for: Distribution, conservation status and proposed measures for preservation of Radiodiscus microgastropods in Chile
Source: PeerJ. 2023 Jan 10;11:e14027. doi: 10.7717/peerj.14027 (PMC9838206; doi:10.7717/peerj.14027)
Supplement: Table S1 — Empty cells mean no information or not applicable. [file peerj-11-14027-s001.xlsx]

## Sheet: Hoja1
	Supplementary Material
	Article: Distribution, conservation status and proposed measures for preservation of Radiodiscus microgastropods in Chile.
	Authors: Gonzalo A. Collado, Rodrigo B. Salvador, Marcela A. Vidal, Fernanda Parra, Vannia Delgado and Cristian Torres-Díaz.
	Table S1. Details and results of georeferencing of Chilean Radiodiscus species. Empty cells mean no information or not applicable.
	Species	ID	Region	Locality	Latitude	Longitude	Georeferencing method	Uncertainty radius (km)	Year of occurrence record	Link to GBIF	Habitat quality for NatureServe	Genus of the binomial when
									(and source)		assessment (this study)	the registration was made
	Radiodiscus australis	1	Magallanes y Antártica Chilena	Península Brunswick	-53.5000	-71.4166	Radio-point	43.87	Miquel & Bellosi (2007)		Good	Radiodiscus
	Radiodiscus australis	2	Magallanes y Antártica Chilena	Sur isla de Tierra del Fuego	-53.8640	-69.3909	Radio-point	51.92	Miquel & Bellosi (2007)		Good	Radiodiscus
	Radiodiscus coarctatus	3	Magallanes y Antártica Chilena	Última esperanza, Bahía Angélica, Caleta Nantuel, Isla Vidal Gormaz.	-51.8333	-74.6833	Direct		Hylton Scott (1979)		Good (land near point)	Radiodiscus
	Radiodiscus coarctatus	4			45°		Not included in the assesment		Valdovinos (1999)			Radiodiscus
	Radiodiscus coarctatus	5			50°		Not included in the assesment		Valdovinos (1999)			Radiodiscus
	Radiodiscus coarctatus	6			55°		Not included in the assesment		Valdovinos (1999)			Radiodiscus
	Radiodiscus coppingeri	7	Magallanes y Antártica Chilena	Tom Bay	-50.2086	-74.8199	Radio-point	4.26	Smith (1881)		Good	Helix (Patula)
	Radiodiscus coppingeri	8	Magallanes y Antártica Chilena	Patagonia Chilena y Tierra de Fuego	51°S to 53°S		Not included in the assesment		Stuardo & Vega (1985); MMA			Radiodiscus
	Radiodiscus coppingeri	9	Los Lagos	Parque Nacional Vicente Pérez Rosales	-41.0705	-72.0850	Radio-point	39.41	Miquel & Bellosi (2007)		Good	Radiodiscus
	Radiodiscus coppingeri	10	Magallanes y Antártica Chilena	Península Brunswick	-53.5000	-71.4166	Radio-point	43.87	Miquel & Bellosi (2007)		Good	Radiodiscus
	Radiodiscus coppingeri	11	Magallanes y Antártica Chilena	isla de Tierra del Fuego (Chile-Argentina)	-53.8640	-69.3909	Radio-point	51.92	Miquel & Bellosi (2007)		Good	Radiodiscus
	Radiodiscus coppingeri	12	Magallanes y Antártica Chilena	Morena frontal del Cerro Balmaceda	-51.4486	-73.1514	Radio-point	0.94	Darrigran & Damborenea (2017) in GBIF *	https://www.gbif.org/es/occurrence/1500052161	Good	Radiodiscus
	Radiodiscus coppingeri	13	Los Ríos	Sierra Pelada, camino de Unión a Hueicolla	-40.1747	-73.4653	Radio-point	2. 77	Darrigran & Damborenea (2017) in GBIF	https://www.gbif.org/es/occurrence/1500052122	Good	Radiodiscus
	Radiodiscus coppingeri	14	Magallanes y Antártica Chilena	Punta Arenas	-53.1467	-70.9159	Radio-point	4.42	Darrigran & Damborenea (2017) in GBIF	https://www.gbif.org/es/occurrence/1500052125	Poor: city present (Punta Arenas)	Radiodiscus
	Radiodiscus coppingeri	15	Magallanes y Antártica Chilena	Cerro Balmaceda, Glaciar	-51.4545	-73.1914	Radio-point	2.17	Darrigran & Damborenea (2017) in GBIF	https://www.gbif.org/es/occurrence/1500052126	Good	Radiodiscus
	Radiodiscus coppingeri	16	Magallanes y Antártica Chilena	Última Esperanza, Bahía Angélica, Caleta Nantuel, Isla Vidal Gormaz	-51.8963	-74.6747	Radio-point	10.41	Darrigran & Damborenea (2017) in GBIF	https://www.gbif.org/es/occurrence/1500053878; https://www.gbif.org/es/occurrence/730553873	Good	Radiodiscus
	Radiodiscus coppingeri	17	Magallanes y Antártica Chilena	Magallanes, Río Serrano, margen oriental	-51.2729	-73.0839	Radio-point	2022-09-12	Darrigran & Damborenea (2017) in GBIF	https://www.gbif.org/es/occurrence/1500052154	Good	Radiodiscus
	Radiodiscus coppingeri	18	Magallanes y Antártica Chilena	Puerto Bellavista	-51.4742	-73.2682	Radio-point	0.25	Darrigran & Damborenea (2017) in GBIF	https://www.gbif.org/es/occurrence/1500052089; https://www.gbif.org/es/occurrence/730553869	Good	Radiodiscus
	Radiodiscus coppingeri	19	Magallanes y Antártica Chilena	Puerto Toro, margen occidental, cerca del glaciar Balmaceda	-51.4398	-73.1256	Radio-point	1.15	Darrigran & Damborenea (2017) in GBIF	https://www.gbif.org/es/occurrence/1500052114; https://www.gbif.org/es/occurrence/730553882	Good	Radiodiscus
	Radiodiscus coppingeri	20	Magallanes y Antártica Chilena	cercano al Río Serrano.	-51.4000	-73.0666	Direct		Tablado & Rodríguez (2021) in GBIF*	https://www.gbif.org/es/occurrence/730553866	Good	Radiodiscus
	Radiodiscus coppingeri	21	Magallanes y Antártica Chilena		-51.4000	-73.0500	Direct		Tablado & Rodríguez (2021) in GBIF	https://www.gbif.org/es/occurrence/730553869	Good	Radiodiscus
	Radiodiscus coppingeri	22	Magallanes y Antártica Chilena		-51.1666	-73.1166	Direct		Tablado & Rodríguez (2021) in GBIF	https://www.gbif.org/es/occurrence/730553868	Good	Radiodiscus
	Radiodiscus coppingeri	23	Magallanes y Antártica Chilena	Puerto Virtudes, isla Virtudes	-51.5301	-74.9155	Radio-point	2.72	Tablado & Rodríguez (2021) in GBIF	https://www.gbif.org/es/occurrence/730553878	Good	Radiodiscus
	Radiodiscus coppingeri	24	Los Lagos	Cerro philippi (Llanquihue, Puerto Varas,)	-41.3108	-72.9800	Radio-point	0.13	Hylton Scott (1970)		Good	Radiodiscus
	Radiodiscus coppingeri	25	Los Lagos	Puerto Varas	-41.3255	-72.9817	Radio-point	2.28	Hylton Scott (1970)		Good habitat in Puerto Varas city	Radiodiscus
	Radiodiscus coppingeri	26	Magallanes y Antártica Chilena	De Natales a punta Arenas	-52.4416	-71.7205	Radio-point	95.05	Hylton Scott (1970)		Good	Radiodiscus
	Radiodiscus coppingeri	27	Aysén	Desde cerro castillo a cerro campana	-46.0166	-72.2895	Radio-point	8.26	Hylton Scott (1970)		Good	Radiodiscus
	Radiodiscus coppingeri	28	Magallanes y Antártica Chilena	Seno Skyring	-52.5656	-72.1073	Radio-point	45.07	Hylton Scott (1970)		Good	Radiodiscus
	Radiodiscus coppingeri	29	Magallanes y Antártica Chilena	Última Esperanza, Western y Puerto virtudes (Isla Virtudes).	-51.5166	-74.900	Direct		Hylton Scott (1979)		Good (land near point)	Radiodiscus
	Radiodiscus coppingeri	30	Magallanes y Antártica Chilena	Última Esperanza.	-51.4666	-73.2666	Direct		Hylton Scott (1979)		Good	Radiodiscus
	Radiodiscus coppingeri	31	Magallanes y Antártica Chilena	Península de Brunswik, lago el Parrillar.	-53.4166	-71.2500	Direct		Hylton Scott (1979)		Good	Radiodiscus
	Radiodiscus coppingeri	32	Magallanes y Antártica Chilena	margen occidental del Río Serrano, Puerto Toro.	-53.5666	-73.0833	Direct		Hylton Scott (1979)		Good	Radiodiscus
	Radiodiscus coppingeri	33	Magallanes y Antártica Chilena	Última Esperanza, Puerto Toro, orillas de seno cerca del glaciar del cerro balmaceda.	-51.4000	-73.0833	Direct		Hylton Scott (1979)		Good	Radiodiscus
	Radiodiscus coppingeri	34	Magallanes y Antártica Chilena	Última Esperanza, Puerto Toro, sobre morena frontales del glaciar del cerro Balmaceda.	-51.4166	-73.1000	Direct		Hylton Scott (1979)		Good (land near point)	Radiodiscus
	Radiodiscus coppingeri	35	Magallanes y Antártica Chilena	Última Esperanza, margen occidental del Río Serrano. En bosque de Notbofagus betuloides, N. antarctica y Pilgerodendron uvifera.	-51.3833	-73.0833	Direct		Hylton Scott (1979)		Good	Radiodiscus
	Radiodiscus coppingeri	36			45°		Not included in the assesment		Valdovinos (1999)			Radiodiscus
	Radiodiscus coppingeri	37			50°		Not included in the assesment		Valdovinos (1999)			Radiodiscus
	Radiodiscus coppingeri	38			55°		Not included in the assesment		Valdovinos (1999)			Radiodiscus
	Radiodiscus coppingeri	39	Los Lagos	Petrohue, Lago Todos los Santos, Provincia de Llanquihue	-41.1381	-72.4007	Radio-point	0.69	Goud J, van der Bijl B, Creuwels J (2022) in GBIF *	https://www.gbif.org/occurrence/2444569071	Good	Radiodiscus
	Radiodiscus coppingeri	40	Magallanes y Antártica Chilena	Fiordo Contra Almirante Martínez	-54.4500	-70.6667	Radio-point	18.84	Tablado & Rodríguez (2021) in GBIF	https://www.gbif.org/es/occurrence/373257333	Good (land near point)	Radiodiscus
	Radiodiscus coppingeri	41	Magallanes y Antártica Chilena	El parrillar, Península de Bruswick, el parrillar	-53.3745	-71.4012	Radio-point	2022-04-11	Tablado & Rodríguez (2021) in GBIF	https://www.gbif.org/es/occurrence/373257370	Good	Radiodiscus
	Radiodiscus coppingeri	42	Magallanes y Antártica Chilena	Ancón Sin Salida, Última Esperanza	-52.2167	-73.3167	Radio-point	6. 41	Tablado & Rodríguez (2021) in GBIF	https://www.gbif.org/es/occurrence/373257378	Good	Radiodiscus
	Radiodiscus coppingeri	43	Magallanes y Antártica Chilena		-52.4166	-73.1000	Direct		Tablado & Rodríguez (2021) in GBIF	https://www.gbif.org/es/occurrence/730553853	Good	Radiodiscus
	Radiodiscus coppingeri	44	Magallanes y Antártica Chilena	Río Serrano	-51.3318	-73.1214	Radio-point	19. 59	Darrigran & Damborenea (2017) in GBIF	https://www.gbif.org/es/occurrence/1500052090	Good (land near point)	Radiodiscus
	Radiodiscus magellanicus	45	Magallanes y Antártica Chilena	Tierra del Fuego.	-53.4244	-69.2528	Radio-point	107.42	Smith (1881)		Good	Helix (Patula)
	Radiodiscus magellanicus	46	Magallanes y Antártica Chilena	Archipielago Madre de Dios a Tierra de Fuego	48°S to 53°S	-	Not included in the assesment		Stuardo & Vega (1985)			Radiodiscus
	Radiodiscus magellanicus	47	Magallanes y Antártica Chilena	margen occidental del río Serrano	-51.4000	-73.0833	Direct		Tablado & Rodríguez (2021) in GBIF	https://www.gbif.org/es/occurrence/730553847	Good	Radiodiscus
	Radiodiscus magellanicus	48	Araucanía	Bellavista, Fundo Flor del Lago	-39.2083	-72.1372	Direct		Tablado & Rodríguez (2021) in GBIF	https://www.gbif.org/es/occurrence/231051340	Good	Radiodiscus
	Radiodiscus magellanicus	49	Magallanes y Antártica Chilena	margen oriental del río Serrano	-51.3166	-73.1166	Direct		Tablado & Rodríguez (2021) in GBIF	https://www.gbif.org/es/occurrence/730553862	Good	Radiodiscus
	Radiodiscus magellanicus	50	Araucanía	Quetrupillén, Parque Nacional Villarrica	-39.4616	-71.8455	Direct		Tablado & Rodríguez (2021) in GBIF	https://www.gbif.org/es/occurrence/231051341	Good	Radiodiscus
	Radiodiscus magellanicus	51	Los Lagos	Sargazo, Parque Nacional Alerce Andino	-41.5100	-72.6125	Direct		Tablado & Rodríguez (2021) in GBIF	https://www.gbif.org/es/occurrence/231051345	Good	Radiodiscus
	Radiodiscus magellanicus	52	Magallanes y Antártica Chilena	Puerto Bellavista	-51.4742	-73.2682	Radio-point	0.25	Tablado & Rodríguez (2021) in GBIF	https://www.gbif.org/es/occurrence/730553877	Good	Radiodiscus
	Radiodiscus magellanicus	53	Magallanes y Antártica Chilena	El Parrillar, península de Brunswich, El Parrillar	-53.3745	-71.4012	Radio-point	2022-04-11	Tablado & Rodríguez (2021) in GBIF	https://www.gbif.org/es/occurrence/373258216	Good	Radiodiscus
	Radiodiscus magellanicus	54	Magallanes y Antártica Chilena	Punta Arenas	-53.1667	-70.9167	Direct		Tablado & Rodríguez (2021) in GBIF	https://www.gbif.org/es/occurrence/730553881	Poor: city present (Punta Arenas)	Radiodiscus
	Radiodiscus magellanicus	55	Magallanes y Antártica Chilena	Puerto Toro	-51.4211	-73.1019	Radio-point	0.05	Tablado & Rodríguez (2021) in GBIF	https://www.gbif.org/es/occurrence/730553883	Good	Radiodiscus
	Radiodiscus magellanicus	56			45°		Not included in the assesment		Valdovinos (1999)			Radiodiscus
	Radiodiscus magellanicus	57			50°		Not included in the assesment		Valdovinos (1999)			Radiodiscus
	Radiodiscus magellanicus	58			55°		Not included in the assesment		Valdovinos (1999)			Radiodiscus
	Radiodiscus magellanicus	59	Magallanes y Antártica Chilena	Isla Londonderry, Puerto fortuna, Pierna de panadero	-54.9085	-70.4331	Radio-point	0.62	Salvador, Waha, Phillips & Breure (2021)		Good	Radiodiscus
	Radiodiscus magellanicus	60	Magallanes y Antártica Chilena	Seno Wide, caleta chacabucó	-49.8064	-74.2952	Radio-point	3.24	Salvador, Waha, Phillips & Breure (2021)		Good	Radiodiscus
	Radiodiscus magellanicus	61	Magallanes y Antártica Chilena	Canal Beagle, caleta Awaiakirrh	-55.0153	-69.0216	Radio-point	1.15	Salvador, Waha, Phillips & Breure (2021)		Good (land near point)	Radiodiscus
	Radiodiscus magellanicus	62	Magallanes y Antártica Chilena	Isla Navarino, Puerto Toro	-55.0830	-67.0753	Radio-point	0.30	Salvador, Waha, Phillips & Breure (2021)		Good	Radiodiscus
	Radiodiscus magellanicus	63	Magallanes y Antártica Chilena	Isla Gordon, caleta morning	-54.9238	-69.4993	Radio-point	1.23	Salvador, Waha, Phillips & Breure (2021)		Good	Radiodiscus
	Radiodiscus magellanicus	64	Magallanes y Antártica Chilena	Seno surmento, Bahía Wodehouse	-51.7996	-73.9315	Radio-point	0.62	Salvador, Waha, Phillips & Breure (2021)		Good (land near point)	Radiodiscus
	Radiodiscus magellanicus	65	Magallanes y Antártica Chilena	Isla Diego de Almagro	-51.5666	-75.1333	Direct		Tablado & Rodríguez (2021) in GBIF	https://www.gbif.org/es/occurrence/730553855	Good (land near point)	Radiodiscus
	Radiodiscus magellanicus	66	Los Lagos	Aguas caliente, parque nacional puyehue	-40.7366	-72.3055	Radio-point	0.43	Tablado & Rodríguez (2021) in GBIF	https://www.gbif.org/es/occurrence/231051347	Good	Radiodiscus
	Radiodiscus magellanicus	67	Magallanes y Antártica Chilena	Seno Skyring	-52.6132	-71.9074	Direct		Tablado & Rodríguez (2021) in GBIF	https://www.gbif.org/es/occurrence/231051402	Good (land near point)	Radiodiscus
	Radiodiscus flammulatus	68	Los Lagos	Proximidad de Cascada de los Novios (Peulla)	-41.0878	-72.0170	Radio-point	0.17	Hylton Scott (1975) in GBIF	https://www.gbif.org/es/occurrence/1500052147	Good	Radiodiscus
	Radiodiscus flammulatus	69	Los Lagos	Parque Nacional Vicente Pérez Rosales (Chile)	-41.0705	-72.0850	Radio-point	39.41	Miquel & Bellosi (2007)		Good	Radiodiscus
	Radiodiscus flammulatus	70	Los Lagos	Camino entre Pargua y Maullín, ruta 5	-41.7701	-73.4447	Radio-point	7.69	Tablado & Rodríguez (2021) in GBIF	https://www.gbif.org/es/occurrence/231051312; https://www.gbif.org/es/occurrence/2447665969	Good	Radiodiscus
	Radiodiscus flammulatus	71	Los Lagos	Correntoso, Parque Nacional Alerce Andino	-41.4647	-72.6452	Direct		Tablado & Rodríguez (2021) in GBIF	https://www.gbif.org/es/occurrence/231051342	Good	Radiodiscus
	Radiodiscus flammulatus	72	Los Lagos	Anticura, Parque Nacional Puyehue	-40.6663	-72.1733	Direct		Tablado & Rodríguez (2021) in GBIF	https://www.gbif.org/es/occurrence/231051343	Good	Radiodiscus
	Radiodiscus flammulatus	73	Araucanía	Laguna Toro, Parque Nacional Huerquehue	-39.1386	-71.7086	Direct		Tablado & Rodríguez (2021) in GBIF	https://www.gbif.org/es/occurrence/231051348	Good	Radiodiscus
	Radiodiscus flammulatus	74	Araucanía	Monumento Natural Contulmo	-38.0130	-73.1875	Direct		Tablado & Rodríguez (2021) in GBIF	https://www.gbif.org/es/occurrence/231051349	Good	Radiodiscus
	Radiodiscus flammulatus	75	Magallanes y Antártica Chilena	Margen oriental de Río Serrano, 12 km al norte de Puerto Toro	-51.3133	-73.1088	Radio-point	8.78	Darrigran & Damborenea (2017) in GBIF	https://www.gbif.org/es/occurrence/1500052171	Good	Radiodiscus
	Radiodiscus flammulatus	76	Biobío	Parque Nacional Laguna del Laja, Laguna del Laja	-37.3816	-71.3442	Radio-point	2022-07-04	Darrigran & Damborenea (2017) in GBIF	https://www.gbif.org/es/occurrence/1500054505	Good	Radiodiscus
	Radiodiscus flammulatus	77	Los Lagos	Maullín, ruta 5	-41.6771	-73.4986	Radio-point	11. 40	Tablado & Rodríguez (2021) in GBIF	https://www.gbif.org/es/occurrence/2447665951	Good	Radiodiscus
	Radiodiscus quillajicola	78	Maule	Sector la Mina, a 925 ms.n.m., distante aproximadamente 10 km del paso internacional Pehuenche (VII Region)	-36.0070	-70.4752	Radio-point	7.30	Vargas-Almonacid (2000)		Good	Radiodiscus
	Radiodiscus riochicoensis	79	Magallanes y Antártica Chilena	Patagonia Argentina a Punta Arenas	51°S to 53°S		Not included in the assesment		Stuardo & Vega (1985)			Radiodiscus
	Radiodiscus riochicoensis	80	Los Lagos	Parque Nacional Vicente Pérez Rosales (Chile)	-41.0705	-72.0850	Radio-point	39.41	Miquel & Bellosi (2007)		Good	Radiodiscus
	Radiodiscus riochicoensis	81	Magallanes y Antártica Chilena	Patagonia Austral: península Brunswick (Chile)	-53.5000	-71.4166	Radio-point	43.87	Miquel & Bellosi (2007)		Good	Radiodiscus
	Radiodiscus riochicoensis	82	Magallanes y Antártica Chilena	Isla de Tierra del Fuego, Chile	-53.8640	-69.3909	Radio-point	51.92	Miquel & Bellosi (2007)		Good	Radiodiscus
	Radiodiscus riochicoensis	83	Magallanes y Antártica Chilena	Punta Arenas	-53.1667	-70.9167	Direct		Tablado & Rodríguez (2021) in GBIF	https://www.gbif.org/es/occurrence/730553880	Poor: city present (Punta Arenas)	Radiodiscus
	Radiodiscus riochicoensis	84	Magallanes y Antártica Chilena	A 30 km de Natales a Punta Arenas	-51.8051	-72.1658	Radio-point	3	Hylton Scott (1970) in GBIF	https://www.gbif.org/es/occurrence/1500052168	Good	Radiodiscus
	Radiodiscus riochicoensis	85	Magallanes y Antártica Chilena	falda Cerro Paine	-51.0218	-73.0957	Radio-point	4.64	Hylton Scott (1970) in GBIF	https://www.gbif.org/es/occurrence/1500053362	Good habitat near snowy hill	Radiodiscus
	Radiodiscus riochicoensis	86	Magallanes y Antártica Chilena	Zona de Rubens	-52.0391	-71.9411	Radio-point	0.61	Hylton Scott (1970) in GBIF	https://www.gbif.org/es/occurrence/1500053402	Good	Radiodiscus
	Radiodiscus riochicoensis	87	Aysén	Entre cerro Castillo y cerro Campana	-46.0166	-72.2895	Radio-point	8.26	Hylton Scott (1970) in GBIF	https://www.gbif.org/es/occurrence/1500052111	Good	Radiodiscus
	Radiodiscus riochicoensis	88	Magallanes y Antártica Chilena	Península de Brunswik, lago el Parrillar.	-53.4166	-71.2500	Direct		Hylton Scott (1979)		Good	Radiodiscus
	Radiodiscus riochicoensis	89	Magallanes y Antártica Chilena	Última esperanza, Bahía Angélica, Caleta Nantuel, Isla Vidal Gormaz.	-51.8333	-74.6833	Direct		Hylton Scott (1979) in GBIF	https://www.gbif.org/es/occurrence/1500053955	Good	Radiodiscus
	Radiodiscus riochicoensis	90	Magallanes y Antártica Chilena	Última Esperanza, Puerto Bellavista	-51.4666	-73.2666	Direct		Hylton Scott (1979)		Good	Radiodiscus
	Radiodiscus riochicoensis	91	Magallanes y Antártica Chilena	Puerto Toro	-51.4000	-73.0833	Direct		Hylton Scott (1979) in GBIF	https://www.gbif.org/es/occurrence/730553851	Good	Radiodiscus
	Radiodiscus riochicoensis	92	Magallanes y Antártica Chilena	Última Esperanza, Puerto Toro, sobre morenas frontales del glaciar del cerro Balmaceda.	-51.4166	-73.1000	Direct		Hylton Scott (1979)		Good (land near point)	Radiodiscus
	Radiodiscus riochicoensis	93			45°		Not included in the assesment		Valdovinos (1999)			Radiodiscus
	Radiodiscus riochicoensis	94			50°		Not included in the assesment		Valdovinos (1999)			Radiodiscus
	Radiodiscus riochicoensis	95			55°		Not included in the assesment		Valdovinos (1999)			Radiodiscus
	Radiodiscus riochicoensis	96	Magallanes y Antártica Chilena	Puerto Bellavista	-51.4742	-73.2682	Radio-point	0.25	Tablado & Rodríguez (2021) in GBIF	https://www.gbif.org/es/occurrence/730553871	Good	Radiodiscus
	Radiodiscus riochicoensis	97	Biobío	Concepción	-36.8294	-73.0339	Radio-point	7.91	Darrigran & Damborenea (2017) in GBIF	https://www.gbif.org/es/occurrence/1500053364	Good habitat in Concepción city	Radiodiscus
	Radiodiscus villarricensis	98	Biobío	Fundo El Manzano, Concepción	-36.8616	-72.7950	Radio-point	2.49	Miquel & Barker (2009)		Good	Radiodiscus
	Radiodiscus villarricensis	99	Biobío	Cerro Caracol, Concepción	-36.8396	-73.0397	Radio-point	1.47	Miquel & Barker (2009)		Good	Radiodiscus
	Radiodiscus villarricensis	100	Araucanía	Parque Nacional Villarrica, Área de Quetrupillén, Cautín	-39.4616	-71.8456	Direct		Miquel & Barker (2009)		Good	Radiodiscus
	*: The full reference was provided in the paper.
